# Supplementary material for: Swimming exercise enhances brain plasticity in fish
Source: R Soc Open Sci. 2020 Jan 15;7(1):191640. doi: 10.1098/rsos.191640 (PMC7029906; doi:10.1098/rsos.191640)
Supplement: Data file used for statistical analysis [file rsos191640supp2.xlsx]

## Sheet: Morphometric data
Treatment	Weight	Timepoint		Fish	PIT	Treatment	sex	Time	Length start	Weight start	Length end	Weight end	SGR
Exercised	22.1	0		208	D277C8	Control	F	3 weeks	111	16.8	116	20.2	0.0387038	1
Exercised	17.2	0		36	D183D8	Control	F	3 weeks	115	17.3	118	19	0.0196838	2
Exercised	19	0		128	A0AD9E	Control	M	3 weeks	118	18.8	120	20.4	0.0171524	3
Exercised	17.8	0		35	D29856	Control	M	3 weeks	120	18.7	123	21.8	0.0322112	4
Exercised	20.5	0		267	A0A5F5	Control	F	3 weeks	121	20	125	21.6	0.0161618	5
Exercised	24.5	0		209	D26DCE	Control	M	3 weeks	124	21.6	126	21.8	0.0019355	6
Exercised	20.1	0		145	D21B6F	Control	F	3 weeks	127	23.3	131	25.3	0.0172937	7
Exercised	20.4	0		283	DIDB02	Control	M	3 weeks	128	23.3	133	26.5	0.0270252	8
Exercised	23.2	0		52	D19E69	Control	F	3 weeks	134	25.4	139	27.8	0.0189602	9
Exercised	24.3	0		207	A0A3F1	Control	F	3 weeks	135	28.8	139	32.3	0.0240853	10
Exercised	17.4	0		129	D1960D	Control		3 weeks	113	14.9	116	15.6	0.00964104	11
Exercised	19.3	0		212	A0A7DE	Control		3 weeks	115	16.8	121	20.4	0.0407728	12
Exercised	19.8	0		53	D275BF	Control		3 weeks	121	21.2	129	25	0.0346237	13
Exercised	26.4	0		271	D26448	Control		3 weeks	123	21.3	129	23.7	0.0224213	14
Exercised	23.7	0		43	D1E2EC	Control		3 weeks	123	21.2	130	25.4	0.0379571	15
Exercised	17.1	0		144	D20558	Control		3 weeks	123	20.5	130	24.9	0.040833	16
Exercised	17.6	0		211	D28D46	Control		3 weeks	123	20.5	130	24.2	0.0348448	17
Exercised	23.1	0		226	A0C8CC	Control		3 weeks	125	22.1	130	25.4	0.029226	18
Exercised	20.5	0		55	D242CE	Control		3 weeks	125	21.1	131	23.7	0.0244024	19
Exercised	24	0		282	D18117	Control		3 weeks	122	20.6	131	25.3	0.0431578	20
Exercised	16.4	0		286	D1BBD0	Control		3 weeks	123	20.9	131	24	0.029044	21
Exercised	20.3	0		136	D28273	Control		3 weeks	130	25.7	136	28.2	0.0194945	22
Exercised	26	0		140	D19F50	Control		3 weeks	130	25.3	136	28.7	0.0264795	23
Exercised	18.9	0		268	A0C7B4	Control		3 weeks	131	23.4	137	27.1	0.0308275	24
Exercised	22.5	0		281	D1B568	Control		3 weeks	129	26.9	138	31.5	0.0331509	25
Exercised	18.3	0		122	D1ACE3	Control	M	3 weeks	117	17.5	121	21	0.0382875	26
Exercised	26.7	0		221	D272FC	Control	M	3 weeks	127	23.3	134	27.1	0.0317269	27
Exercised	15.3	0		44	D21B2C	Control	F	3 weeks	140	29.9	142	32.6	0.0181553	28
Exercised	24.4	0		106	A0AC02	Exercised	F	3 weeks	111	14.5	116	18	0.0454069	1
Exercised	18.3	0		297	A0B956	Exercised	F	3 weeks	115	17.3	119	19.6	0.0262128	2
Exercised	23.5	0		110	D25097	Exercised	M	3 weeks	114	16.8	120	20.4	0.0407728	3
Exercised	15.8	0		200	D1CA3E	Exercised	F	3 weeks	120	17.8	120	19.3	0.0169904	4
Exercised	15.9	0		308	D26131	Exercised	F	3 weeks	117	18.3	122	22	0.0386697	5
Exercised	27.2	0		95	A0A269	Exercised	F	3 weeks	116	15.9	124	21.6	0.0643386	6
Exercised	19.6	0		303	A10644	Exercised	F	3 weeks	119	19.9	125	23.7	0.0366986	7
Exercised	20.6	0		5	D25347	Exercised	F	3 weeks	120	20.5	126	22.8	0.0223305	8
Exercised	20.4	0		112	A0ABDA	Exercised	F	3 weeks	123	20.9	128	24.1	0.0299172	9
Exercised	23.8	0		318	D2320D	Exercised	F	3 weeks	137	29.9	147	36.8	0.0436043	10
Exercised	21.3	0		204	D2257C	Exercised		3 weeks	114	16	120	18.7	0.0327463	11
Exercised	24.2	0		180	D1C020	Exercised		3 weeks	114	16.6	121	21.7	0.056261	12
Exercised	24.5	0		188	D2117C	Exercised		3 weeks	113	16.5	121	20.4	0.0445566	13
Exercised	23.1	0		298	D1CBED	Exercised		3 weeks	117	18	124	21.3	0.0353504	14
Exercised	22	0		317	D1BE68	Exercised		3 weeks	118	19	127	23.4	0.0437424	15
Exercised	14.5	0		24	D1F263	Exercised		3 weeks	120	18.9	128	22.5	0.0366142	16
Exercised	23.1	0		300	D2468B	Exercised		3 weeks	123	21.8	130	25.9	0.0361899	17
Exercised	21.7	0		314	D18439	Exercised		3 weeks	123	19.5	130	21.5	0.0205041	18
Exercised	25.2	0		307	A0B041	Exercised		3 weeks	121	19.4	131	26.6	0.066284	19
Exercised	16.8	0		100	D19C52	Exercised		3 weeks	128	23.8	133	27.1	0.0272681	20
Exercised	16.9	0		179	A09898	Exercised		3 weeks	128	24	135	27.9	0.0316203	21
Exercised	20.9	0		14	D210E5	Exercised		3 weeks	129	26.4	137	29	0.0197257	22
Exercised	17.8	0		313	D1C59C	Exercised		3 weeks	131	26.3	139	30.8	0.0331686	23
Exercised	21	0		197	D1C069	Exercised		3 weeks	134	28.3	142	32.6	0.0297046	24
Exercised	21.1	0		312	D1E709	Exercised		3 weeks	137	29.5	143	31.1	0.0110917	25
Exercised	32.1	0		198	A0B858	Exercised	F	3 weeks	123	19.5	124	20.6	0.0115241	26
Exercised	17.8	0		115	D26116	Exercised	F	3 weeks	121	21.1	126	24.3	0.0296527	27
Exercised	17.4	0		9	9EAA61	Exercised	F	3 weeks	126	23.2	129	24.6	0.0123048	28
Exercised	24	0		32	A0AD20	Control	F	8 weeks	118	17	131	24.9	0.0801474	1
Exercised	16.6	0		37	D1F187	Control	F	8 weeks	122	20	138	30.3	0.0872372	2
Exercised	31.9	0		48	D1EC63	Control	F	8 weeks	131	25.1	145	35.1	0.07042	3
Exercised	16.3	0		50	D2185B	Control	M	8 weeks	124	22.4	135	29.7	0.0592381	4
Exercised	19.3	0		141	D18022	Control	F	8 weeks	120	18.7	138	31.1	0.106824	5
Exercised	17.5	0		142	D282DF	Control	M	8 weeks	128	22.4	145	33.5	0.0845217	6
Exercised	27.9	0		215	D23CCB	Control	f	8 weeks	122	19.1	134	25.8	0.0631441	7
Exercised	20.8	0		275	D21191	Control	M	8 weeks	131	24.3	143	32.8	0.06299	8
Exercised	19.3	0		277	D18DB0	Control	F	8 weeks	124	21.1	144	35.4	0.108662	9
Exercised	16.5	0		287	A0B522	Control	F	8 weeks	110	16.1	131	26.4	0.103854	10
Exercised	24.1	0		30	D201DF	Control		8 weeks	120	24.1	141	31.4	0.0555652	11
Exercised	22.5	0		31	D2415A	Control		8 weeks	118	18.2	129	24.2	0.0598355	12
Exercised	18.5	0		34	D1FF95	Control		8 weeks	114	15.5	122	20.2	0.0556169	13
Exercised	17.1	0		38	D27F2C	Control		8 weeks	135	27.3	151	41.6	0.0884548	14
Exercised	27.5	0		41	D1842E	Control		8 weeks	112	14.6	122	20	0.0660893	15
Exercised	20.1	0		42	D21CEC	Control		8 weeks	122	20	132	27.6	0.0676375	16
Exercised	23.4	0		45	9EAB45	Control		8 weeks	122	19.5	138	30.9	0.0966718	17
Exercised	21.8	0		123	D1EC59	Control		8 weeks	126	21.7	135	27.7	0.0512652	18
Exercised	28.3	0		126	A0BB1C	Control		8 weeks	134	27	150	42.2	0.0937825	19
Exercised	19.5	0		143	A0929E	Control		8 weeks	125	22.3	142	33.6	0.0860873	20
Exercised	19.5	0		205	D24894	Control		8 weeks	125	22.6	137	29.2	0.0538059	21
Exercised	17.8	0		213	A0DE15	Control		8 weeks	123	20.4	139	30.3	0.0830787	22
Exercised	22.4	0		222	A09F92	Control		8 weeks	126	23	141	31.8	0.0680341	23
Exercised	22.2	0		284	D18561	Control		8 weeks	120	21.3	132	28.7	0.0626199	24
Exercised	21.2	0		288	D288F7	Control		8 weeks	111	16.2	125	23.4	0.0772222	25
Exercised	16	0		29	A0B731	Control		8 weeks	113	15.4	125	22	0.0749017	26
Exercised	19.2	0		33	A0B7C7	Control		8 weeks	111	15.6	127	23.4	0.0851477	27
Exercised	18	0		39	D24E21	Control		8 weeks	122	20.5	134	27.9	0.0647224	28
Exercised	18.4	0		46	A0B8BB	Control		8 weeks	118	17.9	141	33.5	0.131616	29
Exercised	19.2	0		51	D22C2A	Control		8 weeks	117	17	129	23.6	0.068887	30
Exercised	21.1	0		121	D213BC	Control		8 weeks	121	20.1	141	33.5	0.107273	31
Exercised	17.3	0		130	D27CD2	Control		8 weeks	117	16.7	133	26.5	0.0969646	32
Exercised	18	0		131	D20A32	Control		8 weeks	122	19.8	135	28.7	0.0779552	33
Exercised	22.3	0		133	D18D66	Control		8 weeks	120	18.9	130	24.8	0.0570532	34
Exercised	21.8	0		134	A0F5A6	Control		8 weeks	118	17.6	132	27.2	0.0914168	35
Exercised	18.3	0		135	D219D0	Control		8 weeks	127	22.9	140	30.9	0.06292	36
Exercised	18.6	0		138	A09EEF	Control		8 weeks	121	20.4	136	29.2	0.0753131	37
Exercised	19.9	0		146	D1DA3E	Control		8 weeks	120	18.9	135	27.3	0.0772222	38
Exercised	21.8	0		210	D25ECD	Control		8 weeks	118	18	130	26	0.0772222	39
Exercised	19.5	0		216	D26C7A	Control		8 weeks	107	14.2	124	23.7	0.107569	40
Exercised	22.1	0		228	A0BB84	Control		8 weeks	120	20.4	130	26.6	0.055729	41
Exercised	19.4	0		278	D1C2EC	Control		8 weeks	117	17.8	138	30.6	0.113778	42
Exercised	18.3	0		279	D297B6	Control		8 weeks	121	19.9	134	28.1	0.0724605	43
Exercised	22.5	0		285	D1EF63	Control		8 weeks	125	23.3	141	33.5	0.0762493	44
Exercised	25.2	0		291	A0B395	Control		8 weeks	113	15.9	128	23.1	0.0784378	45
Exercised	30.8	0		47	A0D43A	Control	F	8 weeks	122	19.5	133	26.2	0.0620224	46
Exercised	29.5	0		220	A0A959	Control	M	8 weeks	123	20.7	139	32.6	0.0953775	47
Exercised	26.3	0		272	A0EA1B	Control	M	8 weeks	119	18.6	133	27.6	0.0828774	48
Exercised	19.5	0		273	D1B9B0	Control	M	8 weeks	129	24.6	148	39.2	0.0978454	49
Exercised	21.9	0		290	D1F836	Control	F	8 weeks	116	17.1	131	25.8	0.0863722	50
Exercised	19.7	0		49	D1CC5E	Control		8 weeks	111	14.9	126	22.3	0.0846773	51
Exercised	19	0		54	D1E2FE	Control		8 weeks	129	24.3	141	35.3	0.0784154	52
Exercised	29.9	0		119	D2722C	Control		8 weeks	112	14.3	122	20	0.0704493	53
Exercised	21.1266	0		124	D2176C	Control		8 weeks	125	21.4	139	31.1	0.0785015	54
Exercised	3.72958	0		127	D1CFA4	Control		8 weeks	115	16.1	125	21.5	0.0607391	55
Exercised	0.357229	0		132	D188A2	Control		8 weeks	124	21.1	135	26.8	0.0502171	56
Control	15.4	0		137	D1BACA	Control		8 weeks	121	20	134	26	0.0550965	57
Control	24.1	0		139	D1F0F0	Control		8 weeks	134	27.6	150	39.1	0.0731444	58
Control	18.2	0		206	D1A74F	Control		8 weeks	118	18.8	141	35.3	0.132305	59
Control	17	0		214	D1B119	Control		8 weeks	132	25.5	144	32.6	0.0515831	60
Control	15.6	0		217	D2834B	Control		8 weeks	120	18.6	137	29.2	0.0947115	61
Control	15.5	0		219	D191A3	Control		8 weeks	118	20.3	135	29	0.0749017	62
Control	18.7	0		223	A0DF49	Control		8 weeks	123	19.5	139	30.5	0.0939356	63
Control	17.3	0		224	D1C076	Control		8 weeks	137	29.5	147	35.9	0.0412329	64
Control	20	0		225	A0EEBC	Control		8 weeks	125	21.1	139	28.2	0.0609103	65
Control	27.3	0		227	D2471B	Control		8 weeks	128	22.9	149	36	0.0950002	66
Control	20.5	0		229	D19B2F	Control		8 weeks	120	18.8	130	23.8	0.049524	67
Control	18.9	0		230	D1FBD5	Control		8 weeks	118	18.7	132	25.3	0.063479	68
Control	14.6	0		231	A0B22D	Control		8 weeks	134	26.1	151	37.8	0.0777785	69
Control	20	0		269	D24B32	Control		8 weeks	129	24.3	150	37.9	0.0933397	70
Control	21.2	0		270	D269A4	Control		8 weeks	116	16.6	131	23.7	0.0747752	71
Control	29.9	0		280	A0A0DC	Control		8 weeks	125	20.9	139	28.4	0.0643944	72
Control	19.5	0		289	D1AD0A	Control		8 weeks	124	21.4	140	31.6	0.0818509	73
Control	17.9	0		12	A10C5D	Exercised	F	8 weeks	119	19.3	136	30.1	0.0933282	1
Control	19.5	0		16	D19136	Exercised	F	8 weeks	117	17.1	129	23.3	0.0649687	2
Control	25.1	0		19	9EA7AC	Exercised	F	8 weeks	122	20.5	142	33.5	0.103135	3
Control	14.9	0		26	D238AE	Exercised	M	8 weeks	118	18.3	137	30	0.103802	4
Control	22.4	0		118	D1A82B	Exercised	F	8 weeks	119	17.4	136	29.7	0.112282	5
Control	17	0		199	D1D4C2	Exercised	M	8 weeks	124	19.5	140	32.4	0.106626	6
Control	25.4	0		306	D22561	Exercised	F	8 weeks	123	22.1	139	31.9	0.077076	7
Control	21.2	0		310	D28FAC	Exercised	F	8 weeks	132	25.2	142	40.8	0.101186	8
Control	24.3	0		311	D1B1BD	Exercised	M	8 weeks	137	30.8	151	41.7	0.0636272	9
Control	21.1	0		315	A0A515	Exercised	F	8 weeks	123	21.9	139	31.5	0.0763352	10
Control	17.6	0		1	D21C62	Exercised		8 weeks	124	22.1	144	33.4	0.0867254	11
Control	14.3	0		2	D23CE2	Exercised		8 weeks	113	17.2	134	30.1	0.117519	12
Control	21.6	0		4	A0CEB5	Exercised		8 weeks	115	17.8	132	28.6	0.0995837	13
Control	20.1	0		15	D2197F	Exercised		8 weeks	125	23.7	145	37.6	0.0969211	14
Control	17.5	0		17	9EA418	Exercised		8 weeks	116	17.6	136	30.2	0.113388	15
Control	21.7	0		92	D29F4B	Exercised		8 weeks	119	18.3	129	24.9	0.064673	16
Control	21.4	0		102	D18B17	Exercised		8 weeks	130	24.2	140	30.7	0.0499611	17
Control	16.4	0		107	D25646	Exercised		8 weeks	128	23.1	142	32.5	0.0716956	18
Control	27	0		111	A100D4	Exercised		8 weeks	115	16.9	130	25.9	0.0896552	19
Control	16.1	0		182	D2814B	Exercised		8 weeks	115	16.3	132	27.4	0.109069	20
Control	18.8	0		192	D1EEAF	Exercised		8 weeks	117	17.1	131	25.7	0.0855566	21
Control	14.9	0		203	A09F36	Exercised		8 weeks	121	21.2	137	32.9	0.092289	22
Control	16.7	0		295	A0CB79	Exercised		8 weeks	123	19.2	134	25.9	0.0628599	23
Control	19.8	0		301	D20777	Exercised		8 weeks	120	18.3	132	25.2	0.067188	24
Control	21.1	0		302	A0DCEE	Exercised		8 weeks	120	18.6	139	31.7	0.111963	25
Control	18.9	0		6	D20725	Exercised		8 weeks	129	24.5	141	30.6	0.0466886	26
Control	17.6	0		8	A0B79D	Exercised		8 weeks	120	20.4	138	30.6	0.0851477	27
Control	22.9	0		18	A0BD87	Exercised		8 weeks	126	23.1	148	37.9	0.103975	28
Control	25.7	0		22	A0D15A	Exercised		8 weeks	120	20.3	139	32.2	0.0968826	29
Control	20	0		28	D28397	Exercised		8 weeks	110	15.3	126	24.3	0.0971509	30
Control	20.4	0		91	D1AE64	Exercised		8 weeks	128	24.4	147	38.9	0.0979463	31
Control	27.6	0		93	D1F95D	Exercised		8 weeks	129	23.5	141	33.9	0.0769471	32
Control	25.3	0		105	D1B2AC	Exercised		8 weeks	127	22	139	30.9	0.0713399	33
Control	18.7	0		113	D294C6	Exercised		8 weeks	118	17.8	131	26.6	0.0843597	34
Control	22.4	0		114	A0E7BA	Exercised		8 weeks	124	21	144	36	0.113189	35
Control	22.3	0		116	A0FFC9	Exercised		8 weeks	138	32.1	152	41.1	0.0519019	36
Control	20.5	0		184	D1D316	Exercised		8 weeks	114	17.5	123	21.9	0.0471	37
Control	23.3	0		185	D2191A	Exercised		8 weeks	134	27.9	150	39.7	0.0740721	38
Control	18.9	0		189	D26A5F	Exercised		8 weeks	127	24.1	145	37.5	0.0928471	39
Control	22.6	0		195	D276D6	Exercised		8 weeks	133	23.4	149	36.5	0.093361	40
Control	18.8	0		201	D21BCA	Exercised		8 weeks	128	22.4	146	38	0.11099	41
Control	28.8	0		202	D1A140	Exercised		8 weeks	125	22.2	139	30.9	0.0694394	42
Control	16.8	0		292	D20A25	Exercised		8 weeks	117	19.2	130	27	0.0715946	43
Control	21.6	0		304	D29EED	Exercised		8 weeks	124	21.8	147	39.6	0.125353	44
Control	18	0		305	D1D179	Exercised		8 weeks	120	19.5	136	30	0.0904644	45
Control	20.5	0		23	D204DE	Exercised	F	8 weeks	131	26	153	43.2	0.106626	46
Control	16.8	0		191	A0D57A	Exercised	M	8 weeks	118	18.5	138	32	0.115073	47
Control	20.4	0		194	A0C27E	Exercised	M	8 weeks	120	20.1	136	30.1	0.0847991	48
Control	25.5	0		299	A0BAD2	Exercised	M	8 weeks	127	22.3	144	35.2	0.0958565	49
Control	19.1	0		316	D29FEF	Exercised	M	8 weeks	120	19.7	139	33.1	0.108972	50
Control	14.2	0		3	A0A9E2	Exercised		8 weeks	117	19	137	31.2	0.104156	51
Control	18.6	0		7	D27CC0	Exercised		8 weeks	121	20.1	140	30	0.0841003	52
Control	21.3	0		10	D1DD28	Exercised		8 weeks	126	24.3	143	33.8	0.0692967	53
Control	20.3	0		11	D24E4F	Exercised		8 weeks	116	17.4	133	27.3	0.0945875	54
Control	20.7	0		13	D1C5C1	Exercised		8 weeks	121	19.8	137	28.4	0.0757485	55
Control	23.3	0		20	D26959	Exercised		8 weeks	127	24	141	31.3	0.0557685	56
Control	23	0		21	D26429	Exercised		8 weeks	112	16.4	133	26.4	0.0999774	57
Control	19.5	0		25	D1C365	Exercised		8 weeks	125	22.5	145	35.4	0.0951713	58
Control	29.5	0		27	D23B82	Exercised		8 weeks	133	26.7	152	38.7	0.077947	59
Control	21.1	0		94	D21E18	Exercised		8 weeks	116	15.8	137	30	0.134649	60
Control	22.1	0		97	D1B082	Exercised		8 weeks	121	19.6	135	28.2	0.0763964	61
Control	22.9	0		98	D211DF	Exercised		8 weeks	127	20.6	145	33.2	0.100224	62
Control	20.4	0		99	A0999B	Exercised		8 weeks	124	20.4	144	33.7	0.105412	63
Control	18.8	0		101	D1EF10	Exercised		8 weeks	126	21.3	144	31.5	0.0821689	64
Control	18.7	0		103	A0A3C0	Exercised		8 weeks	129	24.5	139	29.4	0.0382875	65
Control	26.1	0		108	A0D081	Exercised		8 weeks	127	21.7	139	28	0.0535274	66
Control	22	0		109	D24A60	Exercised		8 weeks	129	25.2	144	34.9	0.068385	67
Control	20	0		117	A0F523	Exercised		8 weeks	116	17.8	142	34.6	0.139578	68
Control	23.4	0		181	A0E1A4	Exercised		8 weeks	140	31.9	161	48	0.085805	69
Control	24.3	0		183	A09794	Exercised		8 weeks	119	19.3	139	31.9	0.105525	70
Control	16.6	0		186	D28318	Exercised		8 weeks	125	20.8	142	30.8	0.082438	71
Control	21.3	0		187	A0F0C7	Exercised		8 weeks	120	19.3	139	30.5	0.0961005	72
Control	18.6	0		190	D29681	Exercised		8 weeks	126	22.5	143	32	0.0739663	73
Control	24.6	0		193	D1C1E3	Exercised		8 weeks	137	27.5	152	37.5	0.0651325	74
Control	24.3	0		196	A0A94D	Exercised		8 weeks	125	21.8	141	32.1	0.0812587	75
Control	20.9	0		294	D1C7CB	Exercised		8 weeks	120	18.4	133	26.9	0.0797529	76
Control	21.1	0		296	D2864B	Exercised		8 weeks	123	21.1	143	33.2	0.0951881	77
Control	17.8	0		309	A096E9	Exercised		8 weeks	125	22.5	139	30	0.0604132	78
Control	19.9	0
Control	20.9	0
Control	26.9	0
Control	20.6	0
Control	23.3	0
Control	21.3	0
Control	23.3	0
Control	20.9	0
Control	16.1	0
Control	16.2	0
Control	21.4	0
Control	17.1	0
Control	15.9	0
Control	20.5565	0
Control	20.5565	0
Control	3.43048	0
Control	0.32858	0

## Sheet: Gene expression data
Assay #	Sample ID	Timepoint	Treatment	Sex	Length	Weight	synap ∆Cp Dl	bdnf ∆Cp Dl	pcna ∆Cp Dl	neurod ∆Cp Dl	synap ∆Cp Dm	bdnf ∆Cp Dm	pcna ∆Cp Dm	neurod ∆Cp Dm	synap ∆Cp Vv	bdnf ∆Cp Vv	pcna ∆Cp Vv	neurod ∆Cp Vv
66	24	3 weeks	Control	F	130	27.8	0.0572047	2.12547	0.00939982	0.162276	0.0555207		0.0988953	0.072922	1.49379	0.493445	0.0489357	0.00352378
1	25	3 weeks	Control	M	133	26.5	0.0748902	4.26554		0.577378	0.164275	2.9443	0.0415421	0.386602	0.837634	0.469585	0.0598868	0.0019954
4	26	3 weeks	Control	F	118	19		2.40864		0.471273	0.327342	2.07533	0.0389101	0.402459	1.39063	0.241204	0.0659603	0.024203
13	27	3 weeks	Control	M	123	21.8	0.173059	0.775514				2.6174			1.00659	0.211571	0.0223363	0.0610326
22	28	3 weeks	Control	F	116	20.2		0.393267	0.00141331	0.020292		2.23227		0.183645			0.055413
43	45	3 weeks	Control	M	120	20.4	0.0152809	4.86921	0.0195352	0.22472	0.0340125	3.36874		0.38923	0.327868	0.163166	0.0154238	0.0161838
49	46	3 weeks	Control	F	125	21.6		3.13959	0.00497868	0.0802068	0.0314463	3.47458	0.0147926	0.169453	0.454527	0.189305	0.012276	0.0209814
25	47	3 weeks	Control	M	126	21.8	0.0347661			0.439585	0.0684728		0.0249424	0.0979404		0.111382	0.031522	0.0527907
7	48	3 weeks	Control	F	131	25.3	0.0646866	3.09012		0.7061	0.139387	2.95117		0.539405		0.415645		0.116461
34	49	3 weeks	Control	F	139	32.3		2.85156		0.122952	0.00358942	1.61721	0.00856847	0.116605	0.0664881			0.00256193
28	29	3 weeks	Exercise	F	125	23.7	0.00247675	2.43179	0.0255219	0.0645212	0.0180953	0.999464	0.0127868	0.0671985	2.07734	0.317396	0.0345147	0.0183352
108	30	3 weeks	Exercise	F	128	24.1	0.0199542	2.48139	0.0299513	0.207325	0.0306413	1.08997	0.0397323	0.147473	0.498851	0.133436	0.0401515	0.0219006
99	31	3 weeks	Exercise	F	120	19.3	0.0136014	2.54003	0.0255937	0.093507	0.0286309	1.38679		0.0608504	0.779217	0.19929		0.00404568
57	32	3 weeks	Exercise	F	126	22.8	0.0151056	2.97974	0.00443672	0.10596	0.0477142	1.28074		0.196493	0.359767		0.00552417
52	33	3 weeks	Exercise	F	124	21.6	0.00657414	4.8616	0.0227905	0.0996546	0.0337347	1.46705	0.00254234	0.0677568	0.837903	0.245736	0.00827056
84	50	3 weeks	Exercise	M	120	20.4					0.143119	5.20584		0.348585	1.10626	0.325676	0.0299274	0.0111547
114	51	3 weeks	Exercise	F	147	36.8	0.0124848	2.38019	0.0387953	0.240379	0.118318	2.77571		0.277841	1.57787	0.194924	0.0301957	0.00360406
90	52	3 weeks	Exercise	F	116	18					0.434453	3.26902	0.0397967	0.160532	1.12279	0.409147	0.0433583	0.0234262
10	53	3 weeks	Exercise	F	122	22	0.00940548	0.846653	0.0077359	0.0235885					2.31874		0.0731304	0.0833378
16	54	3 weeks	Exercise	F	119	19.6	0.0279008	0.933208		0.0912592	0.0735889	1.82615	0.0571509	0.263558		0.590111
55	87	8 weeks	Control	F	131	24.9	0.0127159	1.1978	0.00507894	0.0717188	0.144229	1.27414	0.00751628	0.0695223
102	88	8 weeks	Control	M	145	33.5	0.00349773	2.20863		0.123099	0.0295442	2.58773	0.039761	0.107616	0.290268	0.183255	0.01704	0.0258928
111	89	8 weeks	Control	F	145	35.1	0.0056791	1.61464	0.0116207		0.159855		0.0218614	0.167081	1.26935	0.253344	0.0531321	0.00816131
46	90	8 weeks	Control	F	131	26.4	0.0170775	3.59505	0.000567127	0.403397	0.0278832	1.16176	0.00252374	0.118229	0.585538	0.150744		0.00978159
19	91	8 weeks	Control	F	138	31.1		0.345102	0.00133914	0.0305749	0.050272	1.29034	0.00983963	0.280385	0.0989414	0.109234
63	107	8 weeks	Control	M	143	32.8	0.0396125	4.15912	0.0131449	0.0668348	0.0344846	1.43716		0.063726	0.918013	0.282182	0.0122823	0.00796684
87	108	8 weeks	Control	F	144	35.4	0.0432959	4.98809	0.0121952	0.375669	0.194535		0.0311997	0.173487			0.0306661	0.00356876
81	109	8 weeks	Control	F	134	25.8	0.0537148	6.3866	0.0283504	0.168966	0.143846	2.63119		0.136291			0.0500951	0.036448
105	110	8 weeks	Control	M	135	29.7	0.00853504	2.24034	0.0133971	0.311851	0.0172519	1.50888	0.0362155	0.28775	0.541021	0.280506	0.0336108	0.0551926
72	111	8 weeks	Control	F	138	30.3	0.0230333		0.0277096		0.0270668	2.32428		0.0819883	0.435247	0.298863	0.044219	0.0399015
78	92	8 weeks	Exercise	M	151	41.7	0.026409	3.65056	0.011218	0.606941	0.070776	2.24912			1.70988	0.655193	0.0277793
75	93	8 weeks	Exercise	F	139	31.5	0.00773485	1.51422	0.0219466	0.118371	0.06424	1.59853	0.0248512	0.146237	1.8142	0.212164		0.0010896
31	94	8 weeks	Exercise	F	139	31.9	0.0480566		0.0186145	0.326952		2.83107	0.047021	0.181768		0.151032	0.0309844	0.0101473
69	95	8 weeks	Exercise	F	142	40.8	0.0100979	2.45303	0.0303607	0.10475		2.44339	0.0149903	0.162449	0.952924	0.395124	0.0341365	0.00111436
96	96	8 weeks	Exercise	F	136	29.7	0.0137568	3.38905	0.0103293	0.0459165	0.0603224	2.75602	0.0358691		1.30716	0.410928		0.0126025
93	112	8 weeks	Exercise	M	137	30	0.0404624	1.76367		0.0427175	0.059368	1.41227		0.118024	1.61382	0.657045		0.00744016
37	113	8 weeks	Exercise	F	142	33.5		3.47158	0.0304376	0.188749		1.11845	0.00968147			0.53836	0.0382305	0.00260143
60	114	8 weeks	Exercise	M	140	32.4		0.872119		0.117888	0.0783518	2.87182	0.0225003	0.0722894	0.582917	0.412565	0.0140622	0.00432325
40	115	8 weeks	Exercise	F	136	30.1		2.66042	0.0114493		0.0393177	1.6197	0.0568121	0.100008	0.484711	0.329453
117	116	8 weeks	Exercise	F	129	23.3	0.0160563	2.12857	0.0132205	0.111563	0.0546662	2.48523	0.0567919		0.920177	0.416831	0.0394426
